# Supplementary material
Source: publisher figshare collection journal article supplement (https://asha.figshare.com/ndownloader/files/8668267)
Supplement: Supplementary file 1 [file 8668267]

## Sheet: PARTICIPANT overall
group	participant	all-trials	#err	%err	#rec	%rec	#trials_for-AcAn	%trials_forAcAn	dur-mean	dur-SD	dur-median	m1onset-mean	m1onset-SD	m1onset-median	m1mid-mean	m1mid-SD	m1mid-median	m1offset-mean	m1offset-SD	m1offset-median
adult	4	36	0	0	2	5.5556	34	94.4444	0.20095	0.019079	0.20658	5357.03	1062.04	5288.82	5659.05	1344.42	6614.68	5373.81	1255.83	6108.39
adult	5	36	2	5.5556	0	0	34	94.4444	0.17824	0.014463	0.17856	5076.86	926.76	4679.71	5189.42	1210.17	4672.29	4681.27	1103.62	4144.96
adult	6	36	0	0	1	2.7778	35	97.2222	0.20128	0.013881	0.19841	5322.33	1052.66	5001.32	5489.3	1094.02	5209.44	4933.95	915.47	4642.75
adult	7	36	0	0	0	0	36	100	0.17062	0.017969	0.17161	5088.17	1038.53	4606.4	5319.85	1233.4	5272.48	4867.52	1086.63	4705.34
adult	8	36	0	0	0	0	36	100	0.20443	0.014263	0.20233	5668.72	1342.73	5224.11	5613.55	1486.88	5553.92	5345.98	1089.25	5260.13
adult	9	36	1	2.7778	0	0	35	97.2222	0.16983	0.011853	0.17068	4942.43	761.09	4501.6	5296.38	1060.97	4635.04	5136.6	1078.94	4598.15
adult	11	36	0	0	0	0	36	100	0.20282	0.017551	0.20183	5086.44	853.23	5137.53	5446.36	1284.83	5451.45	5103.91	1171.26	5096.7
adult	13	36	0	0	0	0	36	100	0.20831	0.020825	0.20505	5089.2	986.16	5120.4	5406.84	1276.64	5134.3	4891.48	1159.9	4839.31
adult	15	36	0	0	2	5.5556	34	94.4444	0.19726	0.015501	0.19747	5368.43	873.34	5205.83	5353.67	995.76	5037.84	5252.85	1000.92	4895.78
adult	17	36	1	2.7778	0	0	35	97.2222	0.19061	0.012669	0.19309	4620.01	551.32	4380.33	5061.83	964.44	4473.14	4728.69	783.14	4416.92
TD6	102	36	8	22.2222	5	13.8889	23	63.8889	0.19096	0.046139	0.17943	4311.49	934.32	4462.58	4913.53	992.24	4810.27	4664.67	836.43	4867.88
TD6	103	36	2	5.5556	3	8.3333	31	86.1111	0.20153	0.033676	0.19966	5341.64	794.24	5227.95	5794.83	1003.79	5301.94	5707.26	1016.7	5248.59
TD6	105	36	1	2.7778	1	2.7778	34	94.4444	0.18941	0.020046	0.18872	5194.96	930.77	5297.1	5001.27	1015.06	4850.17	4827.81	993.16	4692.94
TD6	106	36	1	2.7778	0	0	35	97.2222	0.21908	0.025794	0.21499	4886.16	692.91	4966.11	5125.8	876.48	5240.55	4731.02	869.64	4753.17
TD6	108	36	7	19.4444	1	2.7778	28	77.7778	0.15766	0.023886	0.1495	4363.82	928.78	4125.62	4883.66	1128.11	4430.92	4738.48	1114.66	4302.03
TD6	109	36	3	8.3333	0	0	33	91.6667	0.22374	0.070226	0.20239	4708.34	1342.75	4165.23	4916.68	1284.5	4211.04	4720.88	1235.13	4284.96
TD6	204	36	0	0	1	2.7778	35	97.2222	0.21301	0.044119	0.21193	4812.94	692.62	4860.35	5124.32	820.25	5048.51	4558.26	798.65	4587.43
TD6	305	36	2	5.5556	2	5.5556	32	88.8889	0.23938	0.029221	0.24038	5049.94	604.37	5077.37	5324.69	896.67	5487.96	4688.41	816.12	4737.14
TD9	200	36	2	5.5556	0	0	34	94.4444	0.18741	0.025682	0.18083	4009.55	1052.45	4084.91	4505.58	935.28	4594.22	4314.34	1017.01	4509.8
TD9	202	36	1	2.7778	0	0	35	97.2222	0.15569	0.016048	0.15702	5080.57	656.46	4969.91	5212.1	771.3	5251.75	5040.86	659.24	5029.07
TD9	203	36	0	0	3	8.3333	33	91.6667	0.21932	0.033766	0.21378	4634.07	759.57	4729.04	4878.63	843.45	4974.1	4579.78	858.85	4845.82
TD9	205	36	4	11.1111	3	8.3333	29	80.5556	0.2125	0.040025	0.20168	5053.53	870.11	4654.08	5426.67	1134.82	4854.39	5095	945.64	4599.4
TD9	206	36	0	0	0	0	36	100	0.19602	0.025468	0.18988	5375.19	873.8	5176.77	5609.37	964.84	5525.18	5434.94	953.31	5301.62
TD9	208	36	0	0	13	36.1111	23	63.8889	0.17315	0.019865	0.16933	5012.07	921.66	4807.81	5460.32	1072.27	5248.56	5172.1	1066.08	5090.2
TD9	209	36	1	2.7778	6	16.6667	29	80.5556	0.16592	0.022581	0.1624	5259.9	706.79	5144.69	5380.24	847.98	5546.84	5036.52	863.19	5133.52
TD9	210	36	0	0	1	2.7778	35	97.2222	0.20328	0.023517	0.20402	5413.41	659.87	5415.01	5677.02	755.66	5708.64	5319.23	730.86	5171.33
TD9	211	36	0	0	0	0	36	100	0.18247	0.032489	0.18179	4623.02	780.46	4457.13	5068.99	900.87	4782.16	4859.55	889.76	4792.74
SSD6	104	36	21	58.3333	6	16.6667	9	25	0.15652	0.017847	0.15731	4235.1	388.42	3982.4	4581.35	309.83	4503.86	4130.14	244.55	4100.76
SSD6	107	36	19	52.7778	0	0	17	47.2222	0.19139	0.036628	0.1924	4792.5	542.24	4716.81	5099.32	444.98	5081.15	4411.89	559.68	4384.58
SSD6	300	36	12	33.3333	8	22.2222	16	44.4444	0.19374	0.054111	0.17094	3747.53	1243.89	4014.86	5116.76	438.39	5081	4652.42	777.57	4533.63
SSD6	304	36	21	58.3333	4	11.1111	11	30.5556	0.24907	0.0475	0.24987	5378.37	1193.22	5008.19	5993.73	622.37	5825.4	5341.48	485.6	5245.01
SSD6	316	36	19	52.7778	2	5.5556	15	41.6667	0.18357	0.031627	0.18446	3612.67	481.58	3399.85	4281.79	373.18	4353.2	4151.38	403.75	4153.66
SSD6	317	36	11	30.5556	1	2.7778	24	66.6667	0.17261	0.023167	0.16638	4784.96	653.32	4883.45	5266.05	537.15	5188.46	4922.05	743.6	4797.04
SSD6	319	36	14	38.8889	4	11.1111	18	50	0.19007	0.047931	0.18448	4871.1	452.86	4993.93	5029.97	484.42	4954.59	4656.6	553.23	4545.59
SSD6	320	36	2	5.5556	2	5.5556	32	88.8889	0.21159	0.034336	0.21255	4767.39	687.21	4636.83	4893.85	892.25	4687.67	4384.06	629.69	4268.83
SSD9	201	36	3	8.3333	3	8.3333	30	83.3333	0.22248	0.031445	0.22468	4685.34	628.59	4638	5157.84	763.62	4956.6	4842.14	737.17	4598.85
SSD9	307	36	2	5.5556	3	8.3333	31	86.1111	0.1604	0.024424	0.16075	4950.33	949.43	4779.19	5033.2	1086.77	4687.66	4995.93	1093.7	4703.09
SSD9	312	36	13	36.1111	1	2.7778	22	61.1111	0.17832	0.023766	0.1731	4035.16	574.9	3778.33	4313.02	744.18	3963.17	4072.93	728.14	3741.85
	sum	1368	173		78		1117
	mean			12.6462		5.70176		81.652

## Sheet: PARTICIPANT by FRIC+VOWEL
group	participant	fricative	vowel	all-trials	#err	%err	#rec	%rec	#trials_forAcAn	%trials_forAcAn	dur-mean	dur-SD	dur-median	m1onset-mean	m1onset-SD	m1onset-median	m1mid-mean	m1mid-SD	m1mid-median	m1offset-mean	m1offset-SD	m1offset-median
adult	4	s	i	9	0	0	0	0	9	100	0.19558	0.022958	0.20346	6349.94	387.85	6403.19	6830.05	254.727	6756.79	6524.23	303.183	6500.72
adult	4	s	u	9	0	0	0	0	9	100	0.19796	0.022369	0.19945	6224.64	526.64	6369.02	6950.04	235.505	6865.92	6527.81	152.087	6483.6
adult	4	sh	i	9	0	0	2	22.2222	7	77.7778	0.1995	0.014178	0.20066	4314.98	267.5	4382.73	4355.84	179.242	4390.55	4191.25	70.108	4198.52
adult	4	sh	u	9	0	0	0	0	9	100	0.21043	0.013336	0.213	4307.01	157.54	4272.29	4210.69	218.385	4223.92	3989.14	138.368	3924.22
adult	5	s	i	9	0	0	0	0	9	100	0.17412	0.017383	0.16954	5495.76	949.39	5678.99	6332.92	862.653	6144.87	5452.37	889.062	5735.66
adult	5	s	u	9	2	22.2222	0	0	7	77.7778	0.17549	0.013387	0.17626	6174.56	553.18	6147.89	6196.14	935.069	6351.49	5908.19	762.356	6265.19
adult	5	sh	i	9	0	0	0	0	9	100	0.18059	0.012636	0.1794	4536.01	355.32	4471.3	4400.59	262.176	4503.8	3944.59	228.941	3894.36
adult	5	sh	u	9	0	0	0	0	9	100	0.18216	0.014743	0.18695	4345.04	320.05	4324.51	4051.74	241.778	3995.02	3692.59	221.664	3679.65
adult	6	s	i	9	0	0	1	11.1111	8	88.8889	0.19534	0.012999	0.19709	6316.4	1086.61	6548.39	6936.37	741.036	6787.41	6232.92	508.566	6433.46
adult	6	s	u	9	0	0	0	0	9	100	0.19925	0.017356	0.19681	6071.86	489.68	5979.51	5957.29	585.47	5911.69	5289.97	332.741	5249.08
adult	6	sh	i	9	0	0	0	0	9	100	0.20086	0.011074	0.19841	4665.37	334	4765.08	4638.63	221.565	4611.02	4287.26	226.041	4212.3
adult	6	sh	u	9	0	0	0	0	9	100	0.20902	0.011815	0.20679	4346.14	383.52	4380.43	4585.7	375.977	4558.64	4069.98	183.33	4029.36
adult	7	s	i	9	0	0	0	0	9	100	0.15979	0.021036	0.16586	6222.17	403.84	6164.47	6702.99	305.745	6660.22	6011.7	437.79	5885.06
adult	7	s	u	9	0	0	0	0	9	100	0.17682	0.020061	0.1757	5893.23	452.76	6097.52	6309.77	168.503	6274.34	5773.1	385.511	5834.4
adult	7	sh	i	9	0	0	0	0	9	100	0.17011	0.009664	0.17202	4124.32	191.58	4219.91	4116.47	186.564	4161.24	3872.7	137.508	3844.7
adult	7	sh	u	9	0	0	0	0	9	100	0.17577	0.016401	0.1747	4112.98	151.81	4112.42	4150.2	275.835	4144.47	3812.6	214.423	3789.44
adult	8	s	i	9	0	0	0	0	9	100	0.20016	0.011944	0.20282	7205.24	220.73	7210.7	6937.2	430.678	6902.04	6288.27	383.409	6330.66
adult	8	s	u	9	0	0	0	0	9	100	0.19232	0.008412	0.19415	6658.67	571.7	6846.49	7125.85	446.749	7018.16	6482.45	200.413	6461.63
adult	8	sh	i	9	0	0	0	0	9	100	0.2083	0.011913	0.20184	4497.69	264.23	4446.1	4321.45	299.346	4360.44	4485.74	120.664	4458.97
adult	8	sh	u	9	0	0	0	0	9	100	0.21695	0.012479	0.2194	4313.29	272.73	4282.43	4069.71	306.733	4191.7	4127.49	185.344	4142.32
adult	9	s	i	9	1	11.1111	0	0	8	88.8889	0.17152	0.012905	0.17273	5648.04	694.85	5874.04	6565.12	201.24	6560.65	6337.29	316.085	6385.25
adult	9	s	u	9	0	0	0	0	9	100	0.16433	0.009733	0.16149	5477.36	652.94	5777.13	6116.97	434.928	6293.9	6067.54	286.457	6132.09
adult	9	sh	i	9	0	0	0	0	9	100	0.17361	0.014242	0.17188	4378.94	105.09	4328.88	4304.94	173.179	4251.72	4172.3	217.54	4188.13
adult	9	sh	u	9	0	0	0	0	9	100	0.17007	0.010039	0.17004	4343.78	147.64	4308.1	4339.45	161.894	4337.43	4102.67	255.437	4152.86
adult	11	s	i	9	0	0	0	0	9	100	0.19981	0.026267	0.1957	6009.31	263.77	6081.75	6957.42	331.816	6944.03	6400.89	308.787	6380.52
adult	11	s	u	9	0	0	0	0	9	100	0.19797	0.008483	0.19575	5770.81	119.44	5764.21	6372.83	187.043	6282.69	6018.72	280.298	5942.22
adult	11	sh	i	9	0	0	0	0	9	100	0.20518	0.007131	0.20424	4388.19	193.55	4341.13	4366.01	254.826	4402.12	4260.85	163.993	4223.61
adult	11	sh	u	9	0	0	0	0	9	100	0.20833	0.021398	0.20369	4177.44	317.16	4131.99	4089.18	304.389	4116.76	3735.16	244.618	3705.87
adult	13	s	i	9	0	0	0	0	9	100	0.20462	0.019432	0.19621	6038.08	312.66	6134.83	6913.83	218.95	6823.18	6066.09	618.501	6058.04
adult	13	s	u	9	0	0	0	0	9	100	0.20078	0.019622	0.20373	6023.83	230.19	6026.88	6305.35	453.092	6350.51	5846.95	412.401	5842.87
adult	13	sh	i	9	0	0	0	0	9	100	0.21296	0.019859	0.21129	4199.26	228.38	4238.33	4219.7	229.697	4224.46	3975.77	296.584	3981.87
adult	13	sh	u	9	0	0	0	0	9	100	0.21488	0.024259	0.21558	4095.65	233.75	4090.17	4188.49	325.392	4143.39	3677.12	252.634	3627.97
adult	15	s	i	9	0	0	0	0	9	100	0.19449	0.018441	0.194	6238.5	252.03	6249.05	6021.6	423.132	5861.14	6038.71	417.168	5906.2
adult	15	s	u	9	0	0	1	11.1111	8	88.8889	0.20262	0.018734	0.20067	6145.45	296.01	6148.83	6558.47	318.805	6459.04	6388.89	146.319	6413.75
adult	15	sh	i	9	0	0	1	11.1111	8	88.8889	0.19167	0.013016	0.1874	4566.46	243.73	4587.81	4419.21	182.472	4466.07	4273.04	140.117	4279.21
adult	15	sh	u	9	0	0	0	0	9	100	0.20026	0.010819	0.20154	4520.56	216.23	4503.51	4445.45	195.93	4466.61	4328.13	123.545	4354.41
adult	17	s	i	9	0	0	0	0	9	100	0.18366	0.014143	0.18434	5019.49	231.24	4946.04	5943.74	372.788	6037.43	5272.76	352.928	5297.45
adult	17	s	u	9	1	11.1111	0	0	8	88.8889	0.18801	0.007835	0.18907	5241.69	383.86	5262.93	6064.98	247.206	6128.85	5655.6	240.305	5704.83
adult	17	sh	i	9	0	0	0	0	9	100	0.19281	0.015896	0.19897	4192.15	102.71	4197.25	4279.68	119.077	4236.96	4264.19	109.422	4248.3
adult	17	sh	u	9	0	0	0	0	9	100	0.19768	0.007281	0.19394	4095.77	133.07	4079.67	4070.39	266.783	4093.8	3825.19	257.301	3948.67
TD6	102	s	i	9	2	22.222	2	22.2222	5	55.5556	0.22016	0.069259	0.20029	4782.48	1041.19	5000.71	6212.34	465.52	6271.66	5543.02	379.97	5576.42
TD6	102	s	u	9	3	33.3333	1	11.1111	5	55.5556	0.15465	0.01713	0.15554	5130.63	548.535	4828.12	5519.18	464.386	5521.42	5194.43	402.73	5131.04
TD6	102	sh	i	9	0	0	0	0	9	100	0.18396	0.01821	0.18608	4029.05	609.515	4198.47	4353.24	454.893	4548.96	4410.23	530.19	4507.26
TD6	102	sh	u	9	3	33.3333	2	22.2222	4	44.4444	0.21558	0.05802	0.20287	3334.33	750.95	3217.21	3793.65	234.156	3771.84	3477.03	379.05	3482.29
TD6	103	s	i	9	0	0	0	0	9	100	0.18954	0.035983	0.17493	5410.54	922.71	5553	6560.82	792.57	6371.38	6858.51	311.06	6760.79
TD6	103	s	u	9	2	22.2222	0	0	7	77.7778	0.18671	0.03027	0.1865	6070.63	630.241	5935.67	6593.71	842.436	6493.44	6030.33	945.94	6426.61
TD6	103	sh	i	9	0	0	1	11.1111	8	88.8889	0.20823	0.03623	0.20015	4830.92	624.081	5001.33	4970.95	142.913	5013.57	4822.64	372.86	4891.81
TD6	103	sh	u	9	0	0	2	22.2222	7	77.7778	0.22412	0.01923	0.21968	5107.77	358.55	5152.91	4952.7	331.41	5011.33	4914.99	311.17	4924.92
TD6	105	s	i	9	1	11.1111	0	0	8	88.8889	0.19091	0.022722	0.18425	6118.71	305.76	6125.45	6150.02	431.34	6017.29	6001.33	350.19	6013.07
TD6	105	s	u	9	0	0	0	0	9	100	0.17345	0.01396	0.16575	5816.83	520.159	5847.71	5553.96	664.036	5558.98	5330.15	555.67	5381.38
TD6	105	sh	i	9	0	0	0	0	9	100	0.20091	0.01991	0.19425	4481.63	644.049	4622.82	4174.59	328.133	4155.26	4182.28	354.57	4276.41
TD6	105	sh	u	9	0	0	1	11.1111	8	88.8889	0.19295	0.01371	0.19227	4374.12	557.366	4325.97	4160.77	676.329	3880.55	3815.38	652.17	3601.31
TD6	106	s	i	9	0	0	0	0	9	100	0.20462	0.022218	0.20353	5576.9	316.13	5686.93	6088.5	317.8	6085.11	5621.08	438.67	5597.61
TD6	106	s	u	9	0	0	0	0	9	100	0.2216	0.01841	0.22154	5364.13	284.826	5463.31	5698.36	238.343	5723.72	5218.88	427.58	5227.61
TD6	106	sh	i	9	0	0	0	0	9	100	0.22415	0.03416	0.21331	4392.36	361.13	4317.82	4325	375.452	4352.46	4282.89	408.87	4265.42
TD6	106	sh	u	9	1	11.1111	0	0	8	88.8889	0.22683	0.02383	0.22685	4126.88	310.618	4121.19	4299.53	414.787	4260.63	3684.99	469.25	3844.56
TD6	108	s	i	9	3	33.3333	1	11.1111	5	55.5556	0.13577	0.013675	0.14379	5365.18	762.74	5563.42	5940.92	638.61	5735.16	5801.08	691.14	5961.63
TD6	108	s	u	9	2	22.2222	0	0	7	77.7778	0.14981	0.01368	0.14401	5042.42	652.181	5031.82	6136.99	468.091	6067.52	5963.28	436.38	6110.9
TD6	108	sh	i	9	2	22.2222	0	0	7	77.7778	0.16358	0.02732	0.16293	3767.28	388.921	3828.88	3959.96	384.75	4062.75	4113.67	419.81	4119.61
TD6	108	sh	u	9	0	0	0	0	9	100	0.17133	0.02319	0.1626	3743.68	643.738	3861.21	4039.92	441.955	4112.76	3681.48	250.27	3728.79
TD6	109	s	i	9	2	22.2222	0	0	7	77.7778	0.21238	0.059044	0.19241	5235.5	1467.22	5388.25	6088.55	806	6213.06	5741	610.54	6154.48
TD6	109	s	u	9	1	11.1111	0	0	8	88.8889	0.20733	0.03358	0.19856	6400.02	361.346	6360.25	6239.98	694.907	6512.73	6063.34	610.6	6283.54
TD6	109	sh	i	9	0	0	0	0	9	100	0.22005	0.02202	0.22272	4016.92	274.522	3984.96	4101.08	260.525	4102.57	4082.69	288.26	4050.78
TD6	109	sh	u	9	0	0	0	0	9	100	0.25086	0.12006	0.20404	3486.02	290.086	3457.4	3644.56	316.976	3589.97	3372.37	443.32	3483.51
TD6	204	s	i	9	0	0	0	0	9	100	0.23917	0.0336	0.23744	4968.29	963.073	4860.35	5435.7	726.016	5249.55	4638.73	1217.49	4688.33
TD6	204	s	u	9	0	0	1	11.1111	8	88.8889	0.20581	0.03467	0.21354	5099.93	491.224	5125.02	5983.25	665.19	6051.02	5153.08	402.38	5023.25
TD6	204	sh	i	9	0	0	0	0	9	100	0.21438	0.04488	0.20144	4837.53	639.462	4882.61	4785.98	492.551	4620.68	4421.02	555.28	4147.34
TD6	204	sh	u	9	0	0	0	0	9	100	0.19187	0.05245	0.18111	4377.89	410.051	4360.66	4387.8	341.598	4310.86	4086.32	381.71	4029.97
TD6	305	s	i	9	0	0	1	11.1111	8	88.8889	0.23604	0.03834	0.22276	5420.09	534.517	5422.46	6279.72	214.402	6197.89	5393.16	484.42	5347.99
TD6	305	s	u	9	0	0	0	0	9	100	0.25612	0.02098	0.25749	5603.4	239.551	5564.64	5959.15	341.185	5935.87	5274.55	442.48	5344.39
TD6	305	sh	i	9	2	22.2222	1	11.1111	6	66.6667	0.23486	0.01532	0.24084	4578.89	111.781	4562.82	4488.03	254.816	4394.45	4176.51	51.75	4189.44
TD6	305	sh	u	9	0	0	0	0	9	100	0.22861	0.03104	0.22677	4481.48	297.735	4553.95	4399.11	254.244	4377.36	3817.11	494.35	3820.25
TD9	200	s	i	9	1	11.1111	0	0	8	88.8889	0.19124	0.01929	0.18622	4767.49	698.993	4930.92	5275.07	471.828	5258.48	5308.37	172.13	5252.01
TD9	200	s	u	9	0	0	0	0	9	100	0.17694	0.027397	0.17127	4899.7	436.35	4800.71	5299.97	392.468	5475.44	5164.9	298.695	5170.27
TD9	200	sh	i	9	0	0	0	0	9	100	0.18686	0.020293	0.18543	3317.11	845.62	3627.69	4014.15	601.053	3799.84	3632.04	555.12	3498.3
TD9	200	sh	u	9	1	11.1111	0	0	8	88.8889	0.19597	0.034159	0.1816	3029.17	555.11	3209.54	3395.28	323.832	3402.98	3131.04	366.156	3227.49
TD9	202	s	i	9	1	11.1111	0	0	8	88.8889	0.16217	0.01457	0.16644	5891.61	207.434	5986.9	6259.93	185.283	6300.68	5941.91	190.41	6023.6
TD9	202	s	u	9	0	0	0	0	9	100	0.14565	0.018505	0.14591	5364.27	484.86	5466.98	5608.94	125.798	5569.59	5224.41	229.072	5149.07
TD9	202	sh	i	9	0	0	0	0	9	100	0.15564	0.017309	0.15295	4639.67	381.76	4856.47	4673.38	299.793	4715.39	4825.64	335.442	4697.58
TD9	202	sh	u	9	0	0	0	0	9	100	0.16	0.009513	0.15909	4516.85	297.46	4562.42	4422.59	299.573	4425.65	4271.6	287.513	4268.6
TD9	203	s	i	9	0	0	0	0	9	100	0.21818	0.0192	0.21378	5281.58	399.987	5310.69	5747.86	213.314	5846.11	5564.3	271.82	5607.15
TD9	203	s	u	9	0	0	1	11.1111	8	88.8889	0.19854	0.01777	0.1986	5257.13	141.94	5288.85	5524.17	249.726	5566.27	5111.96	187.731	5097.92
TD9	203	sh	i	9	0	0	2	22.2222	7	77.7778	0.2424	0.050674	0.23394	4103.17	533.97	4092.59	4062.94	362.164	4058.02	3777.38	306.804	3711.3
TD9	203	sh	u	9	0	0	0	0	9	100	0.22099	0.03298	0.22628	3845.67	332.47	3879.2	4070.02	250.432	4033.03	3746.31	238.047	3728.85
TD9	205	s	i	9	0	0	0	0	9	100	0.22598	0.05624	0.20873	5792.54	489.683	5875.9	6653.72	350.139	6555.9	5974.18	726.88	5972.62
TD9	205	s	u	9	4	44.4444	1	11.1111	4	44.4444	0.20278	0.041352	0.19923	6222.47	96.66	6233.93	6543.75	294.425	6595.65	6098.99	225.397	6094.33
TD9	205	sh	i	9	0	0	2	22.2222	7	77.7778	0.20888	0.02437	0.19675	4317.57	207.42	4374.68	4410.83	187.828	4493.99	4379.96	247.343	4441.74
TD9	205	sh	u	9	0	0	0	0	9	100	0.20615	0.032382	0.20008	4367.41	270.34	4336.52	4493.25	353.351	4483.93	4325.75	223.301	4282.86
TD9	206	s	i	9	0	0	0	0	9	100	0.18579	0.02055	0.18449	6304.65	378.146	6366.02	6723.95	296.199	6597.22	6554.28	329.38	6563.87
TD9	206	s	u	9	0	0	0	0	9	100	0.18906	0.023845	0.18773	6028.51	381.81	5962.25	6294.77	326.167	6325.3	6055.5	400.35	6060.45
TD9	206	sh	i	9	0	0	0	0	9	100	0.19493	0.022287	0.18644	4549.68	331.5	4472.16	4679.96	277.276	4637.58	4693.92	288.619	4666.65
TD9	206	sh	u	9	0	0	0	0	9	100	0.21432	0.028281	0.22447	4617.94	279.15	4593.17	4738.78	226.34	4727.89	4436.08	202.361	4497.16
TD9	208	s	i	9	0	0	4	44.4444	5	55.5556	0.17133	0.02332	0.18291	5283.94	965.783	5711.04	6272.66	695.382	6280.8	6263.98	274.95	6159.47
TD9	208	s	u	9	0	0	3	33.3333	6	66.6667	0.1701	0.016085	0.1645	5844.04	996.21	5639.37	6486.09	565.998	6563.59	6015.28	589.893	5871.6
TD9	208	sh	i	9	0	0	3	33.3333	6	66.6667	0.18586	0.022524	0.18814	4533.33	519.17	4469.33	4966.99	351.476	5001.39	4570.7	433.239	4703.41
TD9	208	sh	u	9	0	0	3	33.3333	6	66.6667	0.16499	0.015718	0.16539	4432.28	382.79	4535.39	4250.91	508.306	4321.05	4020.42	577.574	4291.9
TD9	209	s	i	9	1	11.1111	1	11.1111	7	77.7778	0.16764	0.01548	0.16394	6036.98	261.917	6070.8	6241.7	254.874	6136.85	6005.8	135.02	5946.14
TD9	209	s	u	9	0	0	1	11.1111	8	88.8889	0.16283	0.011523	0.16017	5630.31	385.94	5700.54	5952.33	262.451	5930.18	5578.28	226.842	5652.18
TD9	209	sh	i	9	0	0	3	33.3333	6	66.6667	0.17582	0.02935	0.16695	4812	322.88	4878.63	4874.77	575.967	4865.46	4516.21	395.563	4491.74
TD9	209	sh	u	9	0	0	1	11.1111	8	88.8889	0.16006	0.030804	0.15598	4545.48	447.31	4375.65	4433.45	393.852	4372.77	4036.88	390.516	4026.05
TD9	210	s	i	9	0	0	1	11.1111	8	88.8889	0.1936	0.02309	0.19931	6216.31	389.848	6361.64	6559.02	236.92	6556.25	6247.03	304.11	6269.19
TD9	210	s	u	9	0	0	0	0	9	100	0.19413	0.021355	0.20149	5368.27	459.69	5450.44	5414.98	355.715	5334.86	5157.4	470.802	5171.33
TD9	210	sh	i	9	0	0	0	0	9	100	0.2046	0.020722	0.20486	4931.37	333.55	4941.29	5141.94	449.451	5256.72	4804.95	284.086	4878.72
TD9	210	sh	u	9	0	0	0	0	9	100	0.21971	0.022478	0.22417	5226.88	668.99	5052.09	5690.15	933.649	5814.76	5170.62	821.121	5349.34
TD9	211	s	i	9	0	0	0	0	9	100	0.17976	0.034355	0.1812	5135.67	413.98	5259.41	5589.74	402.174	5642.22	5586.67	276.225	5623.67
TD9	211	s	u	9	0	0	0	0	9	100	0.17376	0.02805	0.18162	5339.11	637.1	5142.92	6135.65	423.072	6039.99	5725.48	516.625	5625.72
TD9	211	sh	i	9	0	0	0	0	9	100	0.18926	0.03744	0.17856	4098.98	398.4	4174.87	4256.3	300.276	4322.18	4214.19	268.801	4160.67
TD9	211	sh	u	9	0	0	0	0	9	100	0.18711	0.032858	0.188	3918.3	434.36	3997.42	4294.28	341.231	4224.82	3911.88	361.808	3921.48
SSD6	104	s	i	9	9	100	0	0		0
SSD6	104	s	u	9	9	100	0	0		0
SSD6	104	sh	i	9	1	11.111	3	33.3333	5	55.5556	0.15774	0.023735	0.16022	4339.67	416.13	4603.23	4701.17	332.62	4751.11	4253.59	211.56	4262.67
SSD6	104	sh	u	9	2	22.222	3	33.3333	4	44.4444	0.15499	0.009625	0.15529	4104.38	361.14	3947.39	4431.58	233.75	4375.77	3975.82	206.52	3965.46
SSD6	107	s	i	9	6	66.667	0	0	3	33.3333	0.16339	0.047665	0.17198	5005.66	729.08	5387.73	5522.26	348.86	5493.57	5359.13	474.55	5161.7
SSD6	107	s	u	9	7	77.778	0	0	2	22.2222
SSD6	107	sh	i	9	4	44.444	0	0	5	55.5556	0.19831	0.03504	0.20549	4800.5	696.9	4823.15	5099.83	200.62	5126.32	4373.68	272.74	4447.99
SSD6	107	sh	u	9	2	22.222	0	0	7	77.7778	0.19771	0.038642	0.18668	4724.58	500.4	4458.6	4970.43	323.1	4994	4082.95	342.46	4272.19
SSD6	300	s	i	9	3	33.333	3	33.3333	3	33.3333	0.2002	0.038359	0.18986	3833.83	2429.41	4700.93	5458.69	581.18	5459.62	4165.55	1012.27	4392.55
SSD6	300	s	u	9	5	55.556	0	0	4	44.4444	0.2135	0.080236	0.21492	2880.53	1186.85	2700	5480.05	255.41	5500.83	5076.05	1207.14	5078.6
SSD6	300	sh	i	9	2	22.222	3	33.3333	4	44.4444	0.21452	0.061353	0.20826	4095.13	735.18	4119.56	4883.58	278.3	4977.1	4869.26	413.89	4791.37
SSD6	300	sh	u	9	2	22.222	2	22.2222	5	55.5556	0.15744	0.009631	0.15306	4111.28	588.14	3922.37	4807.52	226.29	4735.09	4432.18	262.12	4390.9
SSD6	304	s	i	9	4	44.444	1	11.1111	4	44.4444	0.28664	0.040045	0.28489	5078.8	1122.14	5249.82	5933.89	420.18	5917.06	5214.45	92.37	5181.03
SSD6	304	s	u	9	3	33.333	1	11.1111	5	55.5556	0.23336	0.035553	0.24442	5353.89	812.42	5008.19	5695.07	573.53	5538.57	5189.19	414.33	5245.01
SSD6	304	sh	i	9	6	66.667	1	11.1111	2	22.2222
SSD6	304	sh	u	9	8	88.889	1	11.1111		0
SSD6	316	s	i	9	8	88.889	1	11.1111		0
SSD6	316	s	u	9	9	100	0	0		0
SSD6	316	sh	i	9	0	0	0	0	9	100	0.18936	0.027478	0.19215	3600.23	421.02	3469.79	4424.8	199.1	4362.15	4262.59	237.91	4228.71
SSD6	316	sh	u	9	2	22.222	1	11.1111	6	66.6667	0.17489	0.037974	0.18059	3631.33	604.19	3374.71	4067.27	484.23	4245.32	3984.56	556.98	3982.45
SSD6	317	s	i	9	5	55.556	0	0	4	44.4444	0.15392	0.009041	0.15192	5217.88	1074.17	5672.06	5841.44	767.16	6033.48	6091.14	596.66	5991.8
SSD6	317	s	u	9	5	55.556	1	11.1111	3	33.3333	0.17383	0.036011	0.17715	4620.25	971.69	4350.42	5286.47	429.98	5431.41	4711.03	212.83	4601.16
SSD6	317	sh	i	9	1	11.111	0	0	8	88.8889	0.16717	0.020075	0.15788	4890.45	271.91	4915.24	5163.75	275.95	5188.46	4758.97	452.94	4691.69
SSD6	317	sh	u	9	0	0	0	0	9	100	0.18535	0.021172	0.17856	4553.7	564.38	4500.45	5094.45	535.44	5014.75	4617.75	659.17	4454.14
SSD6	319	s	i	9	4	44.444	2	22.2222	3	33.3333	0.13414	0.019445	0.13615	4688.61	798.23	4827.42	5481.05	1034.31	5991.1	5394.79	768.64	5581.43
SSD6	319	s	u	9	8	88.889	0	0	1	11.1111
SSD6	319	sh	i	9	1	11.111	1	11.1111	7	77.7778	0.2171	0.043736	0.221	5110.02	323.92	5095.08	5082.49	158.32	5106.98	4698.64	285.24	4749.48
SSD6	319	sh	u	9	1	11.111	1	11.1111	7	77.7778	0.19798	0.031551	0.19185	4739.15	391.72	4817.73	4799.31	338.09	4857.03	4275.53	375.14	4287.13
SSD6	320	s	i	9	2	22.222	0	0	7	77.7778	0.21842	0.040954	0.22072	5595.13	523.71	5640.46	6038.59	417.22	6095.77	4809.69	786.23	4762.92
SSD6	320	s	u	9	0	0	2	22.2222	7	77.7778	0.19521	0.047906	0.18206	5028.76	523.56	4965.36	5434.27	567.4	5293.59	4735.26	548.46	4526.17
SSD6	320	sh	i	9	0	0	0	0	9	100	0.22028	0.027949	0.2156	4394.22	208.35	4454.77	4278.06	263.85	4268.43	4319.91	346.16	4252.95
SSD6	320	sh	u	9	0	0	0	0	9	100	0.21033	0.021117	0.21107	4293.47	553.82	4305.74	4198.97	520.85	4206.19	3844	358.14	3888.48
SSD9	201	s	i	9	0	0	0	0	9	100	0.21412	0.045538	0.21201	4999.59	594.79	4889.37	5712.27	370.43	5739.71	5290.44	547.15	5408.26
SSD9	201	s	u	9	0	0	3	33.3333	6	66.6667	0.21115	0.02093	0.21215	5160.57	593.42	5384.66	6007.9	218.81	5968.02	5607.56	337.23	5600.08
SSD9	201	sh	i	9	3	33.333	0	0	6	66.6667	0.23123	0.018231	0.23298	4314.76	388.47	4207.11	4673.86	162.18	4627.17	4574.38	313.43	4505.26
SSD9	201	sh	u	9	0	0	0	0	9	100	0.23258	0.026115	0.22582	4301.31	463.41	4297.51	4359.36	386.66	4405.78	4062.08	366.34	4107.52
SSD9	307	s	i	9	1	11.111	0	0	8	88.8889	0.14664	0.015468	0.14765	5789.71	649.17	6013.59	5609.91	1435.62	5875.89	5976.97	617.09	6079.07
SSD9	307	s	u	9	1	11.111	0	0	8	88.8889	0.14095	0.019101	0.13877	5459.3	724.47	5392.27	5931.58	312.8	5914.94	5945.42	299.04	6020.17
SSD9	307	sh	i	9	0	0	3	33.3333	6	66.6667	0.19157	0.006128	0.19296	4671.61	212.73	4726.86	4484.29	286.46	4594.91	4173.42	298.69	4163.14
SSD9	307	sh	u	9	0	0	0	0	9	100	0.16913	0.017401	0.16918	3937.61	590.23	4136.79	4087.95	343.28	4213.6	3828.26	336.49	3957.33
SSD9	312	s	i	9	6	66.667	0	0	3	33.3333	0.17128	0.001585	0.17161	5191.36	350.13	5168.4	5736.45	155.77	5742.74	5497.88	140.75	5576.06
SSD9	312	s	u	9	7	77.778	0	0	2	22.2222
SSD9	312	sh	i	9	0	0	0	0	9	100	0.17736	0.02413	0.17464	3790.92	277.25	3766.54	3902.88	256.67	3909.6	3713.65	167.6	3679.37
SSD9	312	sh	u	9	0	0	1	11.1111	8	88.8889	0.1712	0.009761	0.17041	3725.9	76.2	3752.2	3969.21	149.56	3947.83	3678.76	142.57	3696.81

## Sheet: GROUP by FRIC+VOWEL
group	n	fricative	vowel	%err_mean	%err_SD		%rec-mean	%rec-SD	n_AcAn	#trials_forAcAn-mean	#trials_forAcAn-SD	n		durmn	SDdur		M1onmn	SDM1on		M1mn	SDM1		M1offmn	SDM1off
adult	10	s	i	1.1111	3.5136		1.1111	3.5136	10	8.8	0.42164	10		0.18817	0.014067		6129.14	587.46		6547.78	389.665		6091.3	386.815
adult	10	s	u	3.3333	7.4994		1.1111	3.5136	10	8.6	0.69921	10		0.18931	0.013705		6042.04	413.42		6393.66	326.574		6032.97	394.621
adult	10	sh	i	0	0		3.3333	7.4994	10	8.7	0.67495	10		0.19261	0.013999		4397.85	177.71		4360.84	142.353		4153	189.052
adult	10	sh	u	0	0		0	0	10	9	0	10		0.19856	0.016911		4248.55	141.09		4227.17	175.866		3935.48	237.748
TD6	8	s	i	11.1	13.3		6.0606	7.6395	11	6.27273	2.64919	8		0.19492	0.028834		5450.07	394.6		6017.64	365.406		5762.54	614.139
TD6	8	s	u	11.1	13.3		4.0404	7.4911	10	6.7	2.54078	8		0.19287	0.037824		5519.57	516.09		5983.09	380.834		5616.09	562.37
TD6	8	sh	i	5.6	10.3		3.0303	5.19	11	8.18182	1.07872	8		0.20271	0.02362		4424.96	416.02		4406.33	318.797		4306.01	273.819
TD6	8	sh	u	5.6	11.9		6.0606	9.1133	11	8.09091	1.51357	8		0.20202	0.022778		4131.31	618.24		4164.41	440.887		3864.45	467.998
TD9	9	s	i	3.7037	5.5556		7.4074	14.6986	9	8	1.32288	9		0.18745	0.017141		5763.7	504.09		6130.5	462.516		5935.3	393.355
TD9	9	s	u	4.9383	14.8148		7.4074	11.1111	9	7.88889	1.76383	9		0.17895	0.019692		5520.67	429.06		5933.43	479.034		5543.65	407.554
TD9	9	sh	i	0	0		12.3457	15.1581	9	7.88889	1.36423	9		0.18822	0.023022		4431.97	429.18		4572.29	460.039		4361.12	477.245
TD9	9	sh	u	1.2346	3.7037		4.9383	11.2644	9	8.44444	1.01379	9		0.19167	0.028596		4282.38	528.9		4422.99	640.155		4177.08	580.965
SSD6	8	s	i	56.9444	26.8496		9.7222	12.511	6	4	1.54919	6		0.19259	0.054003		5246.4	407.32		5831.77	281.396		5178.57	568.247
SSD6	8	s	u	63.8889	35.0107		5.5556	8.3992	6	3.66667	2.16025	4		0.20464	0.031379		4255.99	1079.97		5441.1	107.889		4862.74	353.281
SSD6	8	sh	i	20.8333	23.3352		11.1111	14.5479	8	6.125	2.53194	7		0.19437	0.025753		4497.26	555.23		4825.79	377.492		4489.26	250.577
SSD6	8	sh	u	23.6111	28.1327		11.1111	11.8783	7	6.71429	1.88982	7		0.17959	0.020366		4189.57	478.04		4632.59	350.07		4177.25	227.154
SSD9	3	s	i	25.9259	35.7172		0	0	3	6.66667	3.21455	3		0.17709	0.032526		5357.12	585.38		5786.11	77.763		5687.8	349.085
SSD9	3	s	u	29.6296	42.066		11.1111	19.245	3	5.33333	3.05505	2		0.17546	0.051893		5388.46	5.38		5941.48	37.529		5810.12	297.05
SSD9	3	sh	i	11.1111	19.245		11.1111	19.245	3	7	1.73205	3		0.20019	0.029833		4233.5	480.7		4377.23	405.298		4115.92	414.963
SSD9	3	sh	u	0	0		3.7037	6.415	3	8.66667	0.57735	3		0.18847	0.032354		4062.17	280.21		4189.07	229.96		3920.56	207.809

## Sheet: GROUP F-ratio by vowel
group	vowel	n	nS	nSH	m1oncontmn	m1oncontsd		m1contmn	m1contsd		m1offcontmn	m1offcontsd			m1ondiffmn	m1ondiffsd		m1diffmn	m1diffsd		m1offdiffmn	m1offdiffsd
adult	i	10	10	10	1.39338	0.11943		1.50317	0.10516		1.46828	0.09469			1731.29	527.67		2186.94	426.909		1938.31	373.867
adult	u	10	10	10	1.42238	0.09035		1.51534	0.10561		1.53654	0.11653			1793.49	381.12		2166.49	401.956		2097.49	399.86
TD6	i	8	8	8	1.24156	0.14774		1.37104	0.11694		1.33889	0.12481			918.31	566.969		1509.93	470.184		1342.93	521.456
TD6	u	8	8	8	1.35876	0.22385		1.44808	0.16029		1.46506	0.18313			1394.5	643.44		1770.02	467.17		1620.73	667.756
TD9	i	9	9	9	1.30286	0.06168		1.34576	0.08351		1.3684	0.08665			1331.73	248.871		1558.22	308.621		1574.18	217.349
TD9	u	9	9	9	1.30051	0.12445		1.3643	0.19727		1.34658	0.17569			1238.29	426.681		1510.44	822.519		1366.57	653.597
SSD6	i	5	6	7	1.12516	0.11468		1.18654	0.14171		1.12988	0.13246			564.16	528.119		881.25	574.365		591.38	624.953
SSD6	u	3	4	7	0.93607	0.23392		1.16777	0.08788		1.11787	0.07359			-237.59	944.049		756.6	335.467		490.81	298.771
SSD9	i	3	3	3	1.26886	0.10505		1.32937	0.12234		1.39205	0.16823			1123.62	386.536		1408.89	376.946		1571.88	579.34
SSD9	u	2	2	3	1.27823	0.03572		1.37918	0.03478		1.44232	0.11165			1171.31	119.025		1631.79	98.362		1777.69	403.252

## Sheet: GROUP V-ratio by fricative
group	fricative	n	ni	nu		m1iuon	m1iuonSD		m1iu	m1iuSD		m1iuoff	m1iuoffSD		m1iuonDIF	m1iuonDIFsd		m1iuDIF	m1iuDIFsd		m1iuoffDIF	m1iuoffDIFsd
adult	s	10	10	10		1.01343	0.05118		1.02593	0.072875		1.01335	0.09227		87.1	305.187		154.116	452.661		58.336	515.883
adult	sh	10	10	10		1.03512	0.02217		1.03266	0.04174		1.0569	0.04618		149.3	96.722		133.664	168.424		217.521	174.787
TD6	s	8	8	8		0.99192	0.08166		1.0092	0.087451		1.027	0.06399		-69.5	475.454		34.552	509.923		146.447	343.411
TD6	sh	8	8	8		1.08222	0.10986		1.06315	0.077215		1.12225	0.09407		293.65	373.143		241.923	288.131		441.559	327.188
TD9	s	9	9	9		1.0449	0.06362		1.03708	0.093982		1.07351	0.07739		243.04	359.417		197.073	519.442		391.649	402.047
TD9	sh	9	9	9		1.03945	0.05788		1.04096	0.079391		1.04878	0.06381		149.59	229.856		149.3	366.779		184.044	289.761
SSD6	s	4	6	4		1.30727	0.30803		1.08081	0.067964		1.05181	0.18416		1059.82	768.481		435.385	361.798		219.337	870.295
SSD6	sh	7	7	7		1.07296	0.04718		1.04169	0.023567		1.07486	0.02409		307.69	191.234		193.2	104.759		312.014	101.504
SSD9	s	2	3	2		1.01162	0.14652		0.97757	0.022382		0.98777	0.03114		63.02	789.554		-133.681	133.824		-66.452	177.284
SSD9	sh	3	3	3		1.04181	0.0882		1.04369	0.05041		1.04804	0.05089		171.34	366.392		188.161	211.734		195.368	207.786
